# Supplementary material for: NFκB- and MAP-Kinase Signaling Contribute to the Activation of Murine Myeloid Dendritic Cells by a Flagellin A: Allergen Fusion Protein
Source: Cells. 2019 Apr 15;8(4):355. doi: 10.3390/cells8040355 (PMC6523117; doi:10.3390/cells8040355)
Supplement: Supplementary file 1 [file cells-08-00355-s001.pdf]

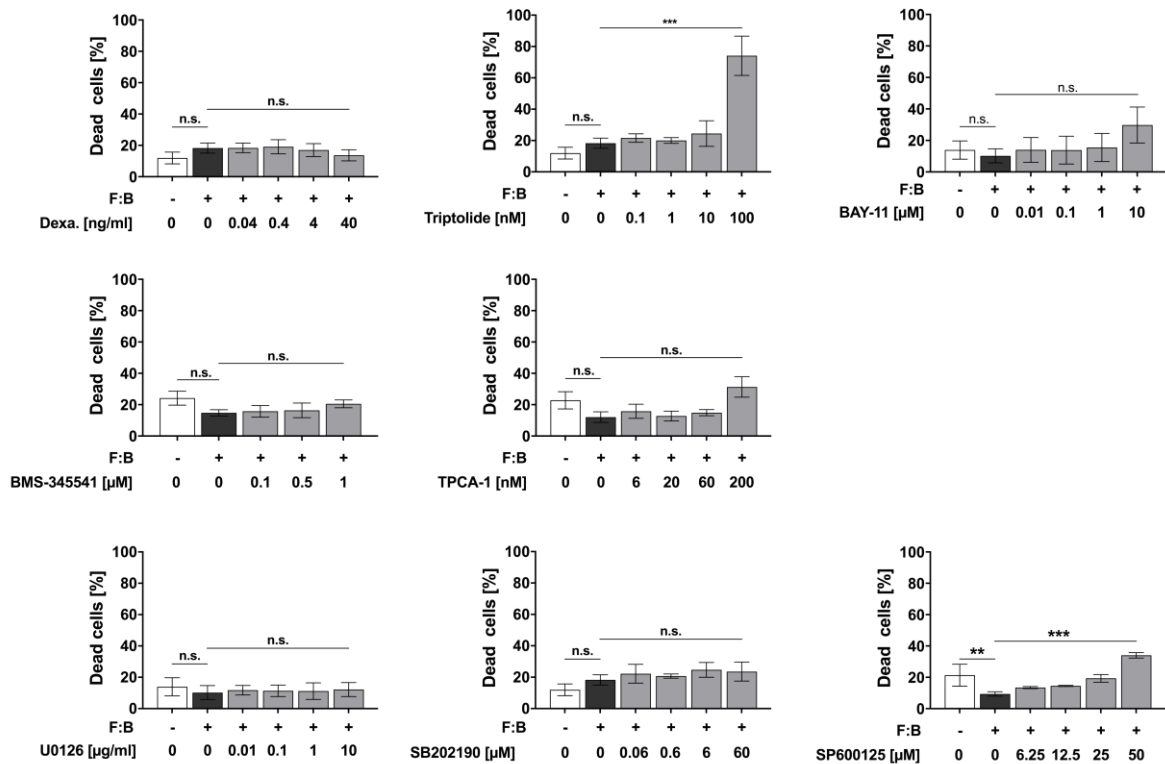

**Repository Figure S1: Toxicity of the different inhibitors on mDC cultures.**  $0.5 \times 10^6$  BALB/c mDCs were pre-treated with the indicated inhibitor concentrations for 90 min and subsequently stimulated with  $27.4 \mu\text{g}$  rFlaA:Betv1 for another 24 h. The frequency of dead cells in mDC cultures 24 h post-stimulation with rFlaA:Betv1 was determined using the fixable viability dye eFlour780. Inhibitor concentrations showing toxic effects were excluded from the subsequent analysis. Data are mean results from three independent experiments  $\pm$  SD.

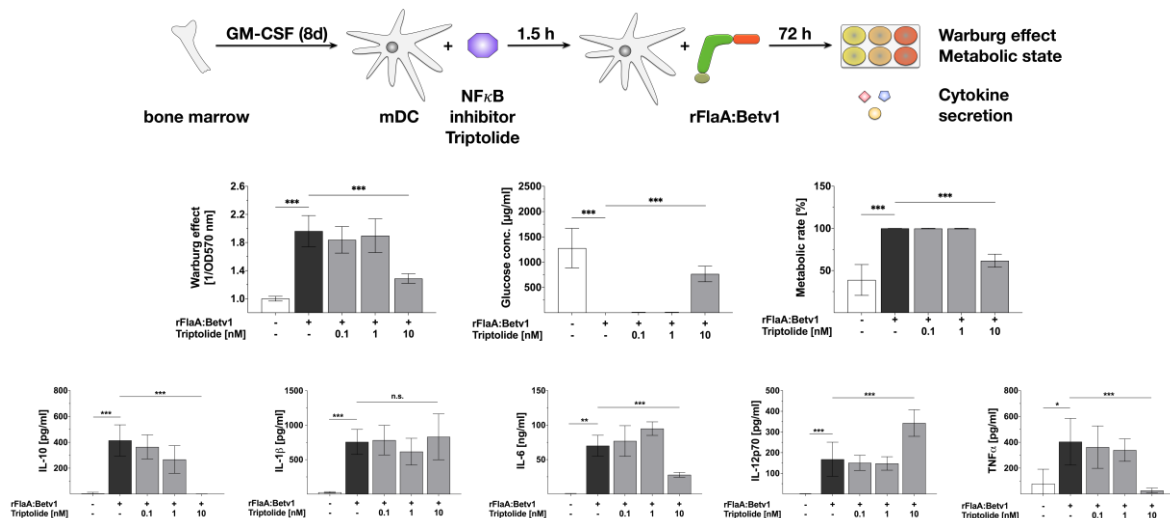

**Repository Figure S2: Effect of triptolide pre-treatment on rFlaA:Betv1-induced cell metabolism and cytokine secretion.**  $0.5 \times 10^6$  BALB/c mDCs were pre-treated with the indicated concentrations of the NFκB inhibitor triptolide for 90 min and subsequently stimulated with  $27.4 \mu\text{g}$  rFlaA:Betv1 for another 72 h. The metabolic state

of the stimulated mDCs was determined 72 h post-stimulation. Cytokine secretion into cell supernatants was determined 72 h post-stimulation by ELISA. Data are mean results of three independent experiments $\pm$ SD.

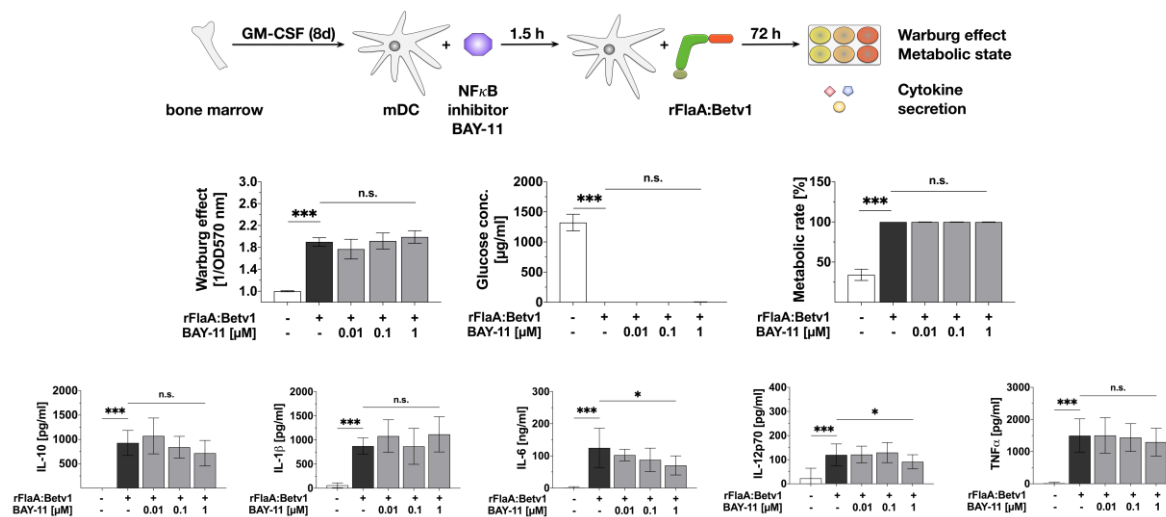

**Repository Figure S3: TNF- $\alpha$ -induced I $\kappa$ B- $\alpha$  phosphorylation does not contribute to rFlaA:Betv1-induced cell metabolism and cytokine secretion.**  $0.5 \times 10^6$  BALB/c mDCs were pre-treated with the indicated concentrations of the irreversible inhibitor of TNF- $\alpha$ -induced I $\kappa$ B- $\alpha$  phosphorylation BAY-11-7082 for 90 min and subsequently stimulated with  $27.4 \mu\text{g}$  rFlaA:Betv1 for another 72 h. The metabolic state of the stimulated mDCs was determined 72 h post-stimulation. Cytokine secretion into cell supernatants was determined 72 h post-stimulation by ELISA. Data are mean results of three independent experiments $\pm$ SD.
